# Supplementary material for: Interpersonal Violence in Belgian Sport Today: Young Athletes Report
Source: MDPI journal article supplement (doi:10.3390/ijerph191811745), 2022-09-17
Supplement: s1 [file s1]

## Supplementary Materials

**Figure S1. Visual representation of the regression model for factors related to IV exposure**

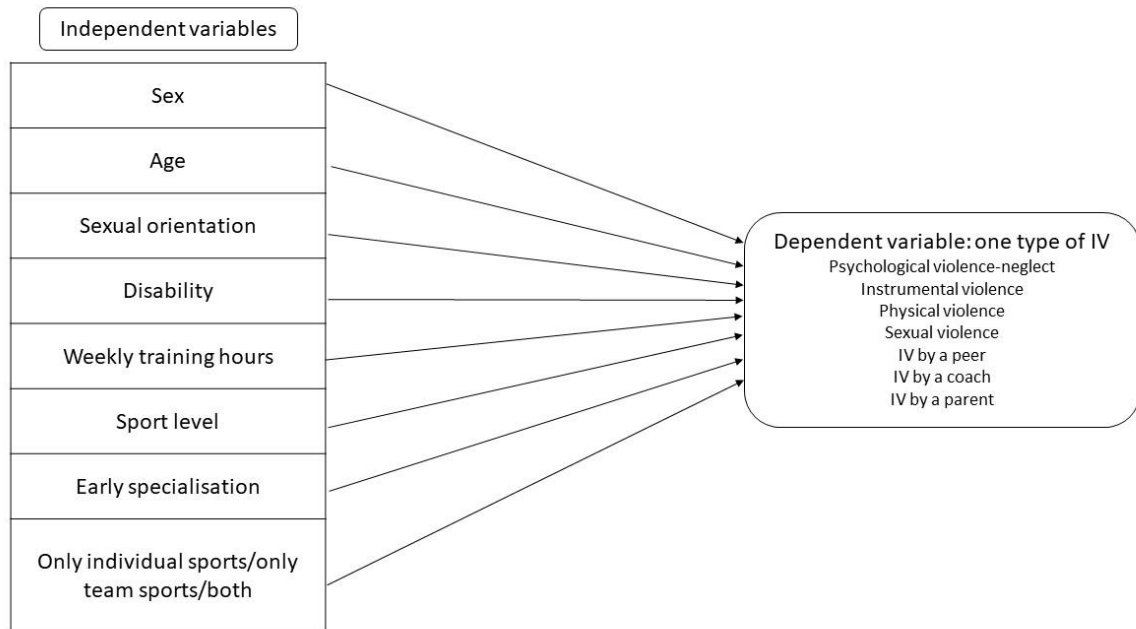

**Table S1. Frequency of the experience with IV from peer athletes, coaches and parents in the context of sport (VTAQ), ordered by frequency in the total sample**

| Item | Summary of item                                            | Total sample |      | Female respondents |      | Male respondents |      |
|------|------------------------------------------------------------|--------------|------|--------------------|------|------------------|------|
|      |                                                            | n            | %    | n                  | %    | n                | %    |
| A2   | Gossip, humiliations                                       | 294          | 38.4 | 113                | 44.1 | 180              | 35.5 |
| A4   | Threats and insults                                        | 285          | 37.2 | 88                 | 34.4 | 197              | 38.9 |
| A1   | Exclusion                                                  | 279          | 36.4 | 119                | 46.5 | 158              | 31.2 |
| C12  | Excessive critiques                                        | 260          | 33.9 | 81                 | 31.6 | 178              | 35.1 |
| C2   | Thrown object at you                                       | 192          | 25.1 | 44                 | 17.2 | 147              | 29.0 |
| C11  | Insults, humiliations                                      | 189          | 24.7 | 68                 | 26.6 | 119              | 23.5 |
| P11  | Excessive critique                                         | 189          | 24.7 | 59                 | 23.0 | 130              | 25.6 |
| A5   | Hit, pushed during competition                             | 151          | 19.7 | 29                 | 11.3 | 121              | 23.9 |
| C13  | Thrown out or excluded                                     | 148          | 19.3 | 66                 | 25.8 | 82               | 16.2 |
| C22  | Forced to participate with injury (against medical advice) | 144          | 18.8 | 47                 | 18.4 | 96               | 18.9 |
| C7   | Objects thrown around                                      | 138          | 18.0 | 39                 | 15.2 | 98               | 19.3 |
| C17  | Forced additional trainings                                | 138          | 18.0 | 41                 | 16.0 | 97               | 19.1 |
| C18  | Forced to train while injured                              | 127          | 16.6 | 50                 | 19.5 | 76               | 15.0 |
| A3   | Damage belongings                                          | 125          | 16.3 | 30                 | 11.7 | 93               | 18.3 |
| C16  | Ignored or ignorant                                        | 120          | 15.7 | 59                 | 23.0 | 60               | 11.8 |
| C19  | Forced to complete too difficult movements                 | 120          | 15.7 | 52                 | 20.3 | 67               | 13.2 |
| A7   | Humiliating sexual comments                                | 119          | 15.5 | 47                 | 18.4 | 71               | 14.0 |
| A6   | Hit, pushed outside competition                            | 118          | 15.4 | 26                 | 10.2 | 90               | 17.8 |
| P10  | Insult, humiliate                                          | 118          | 15.4 | 42                 | 16.4 | 76               | 15.0 |
| C15  | Asked to limit social contacts                             | 117          | 15.3 | 46                 | 18.0 | 70               | 13.8 |
| C9   | Not intervened when you injured an opponent                | 108          | 14.1 | 16                 | 6.3  | 90               | 17.8 |
| C8   | Obliged to injure an opponent                              | 90           | 11.7 | 10                 | 3.9  | 78               | 15.4 |
| P16  | Asked to limit social contacts                             | 90           | 11.7 | 38                 | 14.8 | 52               | 10.3 |
| P3   | Hit with hand                                              | 89           | 11.6 | 24                 | 9.4  | 65               | 12.8 |
| C1   | Being pushed                                               | 88           | 11.5 | 17                 | 6.6  | 70               | 13.8 |
| A8   | Unacceptable sexual behavior                               | 83           | 10.8 | 43                 | 16.8 | 40               | 7.9  |
| P2   | Thrown an object at you                                    | 76           | 9.9  | 13                 | 5.1  | 63               | 12.4 |
| P14  | Ignore or being ignorant                                   | 75           | 9.8  | 27                 | 10.5 | 48               | 9.5  |
| C26  | Sexual comments                                            | 70           | 9.1  | 36                 | 14.1 | 33               | 6.5  |
| C3   | Hit with hand                                              | 68           | 8.9  | 13                 | 5.1  | 54               | 10.7 |
| P21  | Forced participation with injury (against doctor's advice) | 68           | 8.9  | 23                 | 9.0  | 45               | 8.9  |
| C25  | Asked to stop school                                       | 66           | 8.6  | 30                 | 11.7 | 36               | 7.1  |
| P1   | Being pushed                                               | 65           | 8.5  | 15                 | 5.9  | 50               | 9.9  |
| C20  | Forced to lose weight                                      | 60           | 7.8  | 21                 | 8.2  | 39               | 7.7  |
| P7   | Objects thrown around                                      | 57           | 7.4  | 16                 | 6.3  | 41               | 8.1  |
| P17  | Forced to train while injured                              | 56           | 7.3  | 22                 | 8.6  | 34               | 6.7  |
| P15  | Forced additional trainings                                | 50           | 6.5  | 15                 | 5.9  | 35               | 6.9  |
| P12  | Thrown out or excluded                                     | 46           | 6.0  | 21                 | 8.2  | 25               | 4.9  |
| C4   | Hit with fist                                              | 45           | 5.9  | 8                  | 3.1  | 36               | 7.1  |
| C27  | Sexual non-contact behavior                                | 43           | 5.6  | 29                 | 11.3 | 14               | 2.8  |
| P8   | Obliged to injure an opponent                              | 40           | 5.2  | 7                  | 2.7  | 31               | 6.1  |

|     |                                            |    |     |    |     |    |     |
|-----|--------------------------------------------|----|-----|----|-----|----|-----|
| C23 | Not intervene in doping use                | 34 | 4.4 | 9  | 3.5 | 24 | 4.7 |
| P18 | Forced to complete too difficult movements | 31 | 4.0 | 14 | 5.5 | 17 | 3.4 |
| C10 | Threat to abandon                          | 30 | 3.9 | 8  | 3.1 | 21 | 4.1 |
| P4  | Hit with fist                              | 29 | 3.8 | 2  | 0.8 | 27 | 5.3 |
| P19 | Forced to lose weight                      | 29 | 3.8 | 11 | 4.3 | 18 | 3.6 |
| C29 | Sexual conversations                       | 26 | 3.4 | 9  | 3.5 | 15 | 3.0 |
| P9  | Threat to abandon                          | 26 | 3.4 | 10 | 3.9 | 16 | 3.2 |
| P25 | Deny medical care                          | 24 | 3.1 | 11 | 4.3 | 13 | 2.6 |
| C6  | Grabbed by the throat                      | 22 | 2.9 | 2  | 0.8 | 19 | 3.7 |
| C33 | Touched other body parts                   | 18 | 2.3 | 11 | 4.3 | 7  | 1.4 |
| P22 | Not interfere with weight loss             | 18 | 2.3 | 5  | 2.0 | 13 | 2.6 |
| C5  | Hit with hard object                       | 17 | 2.2 | 6  | 2.3 | 10 | 2.0 |
| P6  | Grabbed by the throat                      | 16 | 2.1 | 4  | 1.6 | 12 | 2.4 |
| C28 | Watched you while undress or masturbate    | 15 | 2.0 | 6  | 2.3 | 8  | 1.6 |
| C34 | Sexual kissing                             | 15 | 2.0 | 4  | 1.6 | 11 | 2.2 |
| P5  | Hit with hard object                       | 15 | 2.0 | 1  | 0.4 | 14 | 2.8 |
| P24 | Asked to stop or pause school              | 15 | 2.0 | 5  | 2.0 | 10 | 2.0 |
| A9  | Forced sexual contact                      | 14 | 1.8 | 9  | 3.5 | 5  | 1.0 |
| P13 | Locked up                                  | 14 | 1.8 | 1  | 0.4 | 13 | 2.6 |
| C31 | Exhibitionism                              | 12 | 1.6 | 2  | 0.8 | 9  | 1.8 |
| C14 | Locked up                                  | 11 | 1.4 | 2  | 0.8 | 9  | 1.8 |
| C21 | Forced to use doping                       | 11 | 1.4 | 1  | 0.4 | 9  | 1.8 |
| C24 | Not intervene in doping use                | 10 | 1.3 | 1  | 0.4 | 8  | 1.6 |
| C36 | Sexual penetration                         | 10 | 1.3 | 0  | 0.0 | 9  | 1.8 |
| C35 | Attempted sexual penetration               | 9  | 1.2 | 1  | 0.4 | 7  | 1.4 |
| P23 | Not intervene in doping use                | 9  | 1.2 | 0  | 0.0 | 9  | 1.8 |
| C32 | Touched genitals                           | 8  | 1.0 | 0  | 0.0 | 7  | 1.4 |
| C30 | Filmed during sexual behavior              | 6  | 0.8 | 1  | 0.4 | 4  | 0.8 |
| P20 | Forced to use performance-enhancing drugs  | 6  | 0.8 | 0  | 0.0 | 6  | 1.2 |

*Notes.*

Items starting with an A relate to violence from a peer athlete.

Items starting with a C relate to violence from a coach

Items starting with a P relate to violence from a parent

The total number of respondents consist of male and female respondents, as well as those we did not identify as male or female and those not disclosing their biological sex.
